# Supplementary material for: Traumatic Life Events and Psychopathology in a High Risk, Ethnically Diverse Sample of Young Children: A Person-Centered Approach
Source: Springer Nature journal article supplement (doi:10.1007/s10802-015-0078-8), 2015-09-10
Supplement: MOESM1 [file 798044]

Table S1

Correlations among Study Variables

|  |  | 1 | 2 | 3 | 4 | 5 | 6 | 7 | 8 | 9 | 10 |
| --- | --- | --- | --- | --- | --- | --- | --- | --- | --- | --- | --- |
| 1 | Child Age | – | .00 | .05 | .03 | −.06 | −.03 | .05 | .07 | −.13 | −.08 |
| 2 | Child Female |  | – | −.01 | −.04 | −.01 | .01 | −.06 | −.12 | **−.19** | **−.33** |
| 3 | Spanish Language |  |  | – | **−.19** | **−.39** | .12 | −.11 | −.07 | .11 | .02 |
| 4 | Household Income |  |  |  | – | **.24** | **.18** | −.02 | .05 | −.02 | −.01 |
| 5 | Parent Graduated High School |  |  |  |  | – | −.12 | **.22** | .09 | −.10 | −.06 |
| 6 | Two-Parent Household |  |  |  |  |  | – | −.13 | .04 | .11 | .10 |
| 7 | Average of 23 TESI Items |  |  |  |  |  |  | – | **.38** | **.17** | .10 |
| 8 | Child PTS Symptoms |  |  |  |  |  |  |  | – | **.63** | **.40** |
| 9 | Child Internalizing Symptoms |  |  |  |  |  |  |  |  | – | **.65** |
| 10 | Child Externalizing Symptoms |  |  |  |  |  |  |  |  |  | – |

Bold = *p* < .05
