# Supplementary material for: Traumatic Life Events and Psychopathology in a High Risk, Ethnically Diverse Sample of Young Children: A Person-Centered Approach
Source: Springer Nature journal article supplement (doi:10.1007/s10802-015-0078-8), 2015-09-10
Supplement: MOESM2 [file 798044]

Table S2

Hierarchical Regression Analyses Testing Demographic Moderators of the Relation between Class Membership and Child Symptomatology

|  | Dependent Variable | | | | | |
| --- | --- | --- | --- | --- | --- | --- |
|  | PTS Symptoms | | Internalizing | | Externalizing | |
| Predictor | ΔF | *p* | ΔF | *p* | ΔF | *p* |
| Class × Spanish Language | F(2, 191) = 0.10 | 0.906 | F(2, 187) = 0.47 | 0.624 | F(2, 187) = 0.25 | 0.780 |
| Class × Latina Ethnicity | F(2, 191) = 0.04 | 0.694 | F(2, 187) = 0.28 | 0.758 | F(2, 187) = 1.40 | 0.249 |
| Class × Child Age | F(2, 192) = 1.47 | 0.232 | F(2, 188) = 0.44 | 0.648 | F(2, 188) = 1.55 | 0.215 |
| Class × Child Gender | F(2, 191) = 0.04 | 0.965 | F(2, 187) = 1.80 | 0.168 | F(2, 187) = 1.69 | 0.187 |
